# Supplementary material for: High-throughput screening of bifunctional catalysts for oxygen evolution/reduction reaction at the subnanometer regime
Source: Royal Society of Chemistry journal article supplement (doi:10.1039/d4nr02787f), 2024-01-01
Supplement: d4nr02787f1.pdf [file d4nr02787f1.pdf]

## Supplementary Information

---

### High-Throughput Screening of Bifunctional Catalysts for Oxygen Evolution/Reduction Reaction at the Subnanometer Regime

Rahul Kumar Sharma,<sup>a</sup> Harpriya Minhas,<sup>a</sup> and Biswarup Pathak<sup>a,\*</sup>

<sup>a</sup>Department of Chemistry, Indian Institute of Technology Indore, Indore 453552, India

\*E-mail: [biswarup@iiti.ac.in](mailto:biswarup@iiti.ac.in)

| <u>Contents</u>                                                                           | <u>Page No.</u> |
|-------------------------------------------------------------------------------------------|-----------------|
| 1. Density functional theory (DFT) details.....                                           | S2              |
| 2. Scaling relationship investigation.....                                                | S2              |
| 3. Reaction Energy Diagram of OER and ORR activity.....                                   | S3              |
| 4. Distribution analysis of $I_{df}$ with $E^*_{*O}$ , $E^*_{*OH}$ and $E^*_{*OOH}$ ..... | S3              |
| 5. References.....                                                                        | S4              |

#### 1. Density Functional Theory (DFT) Details

### Text S1:

All the plane-wave spin-polarized density functional calculations were conducted using the Vienna *ab initio* simulation package (VASP) with the Perdew-Burke-Ernzerhof (PBE) functional within the generalized gradient approximation (GGA).<sup>1,2</sup> Ion core and valence electron interactions were described using the projector augmented wave (PAW) method.<sup>3</sup> For relaxation calculations, kinetic energy cut-offs of 500 eV with energy convergence criteria of  $10^{-6}$  eV were employed, and geometric relaxation continued until forces on atoms were smaller than 0.02 eV/Å.<sup>4</sup> Gaussian smearing with a sigma value of 0.2 eV was applied and the  $\Gamma$ -centered (1×1×1) k-point grids were considered for the sampling of the Brillouin zone in congruence with the previous reports.<sup>5,6</sup> However, a higher (3 × 3 × 3) k-mesh was used to calculate the density of states (DOS). A sufficiently large box with dimensions 20 × 20 × 20 Å<sup>3</sup> was utilized to optimize the distinct geometries to avoid the possibility of spurious interaction between the adjacent images along each axis.

## 2. Scaling Relationship Investigation

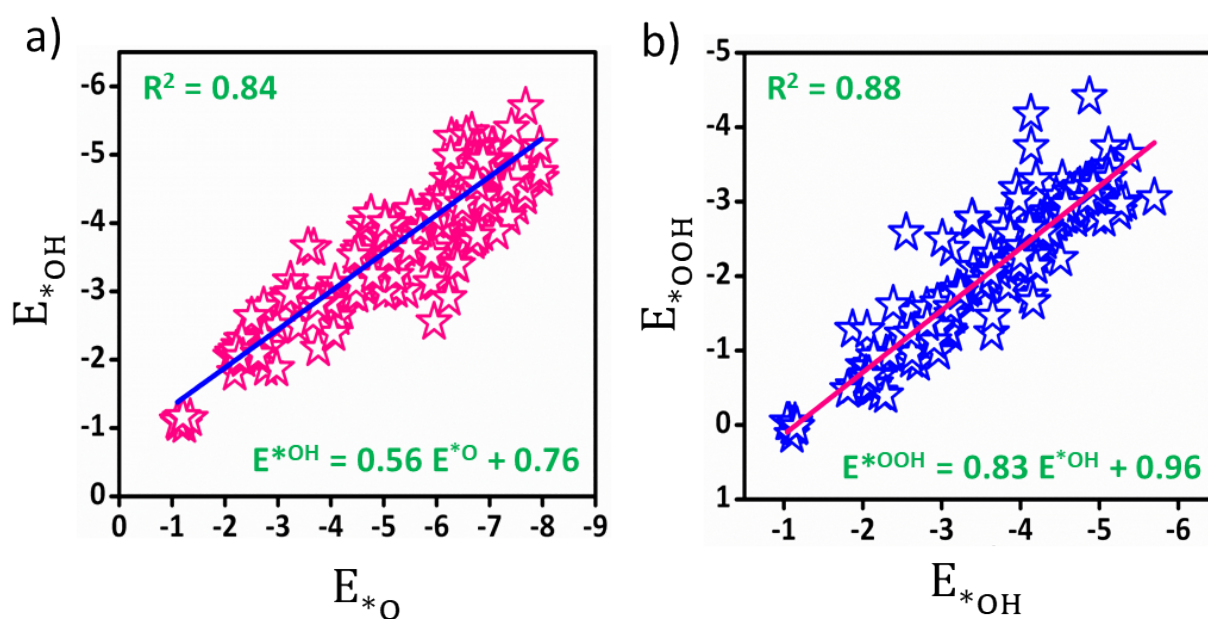

**Figure S1.** Scaling relationship between (a)  $E_{*O}^{vs} E_{*OH}$  and (b)  $E_{*OH}^{vs} E_{*OOH}$  for different-sized  $TM_n$  subnano clusters.

### 3. Reaction Energy Diagram of OER and ORR activity

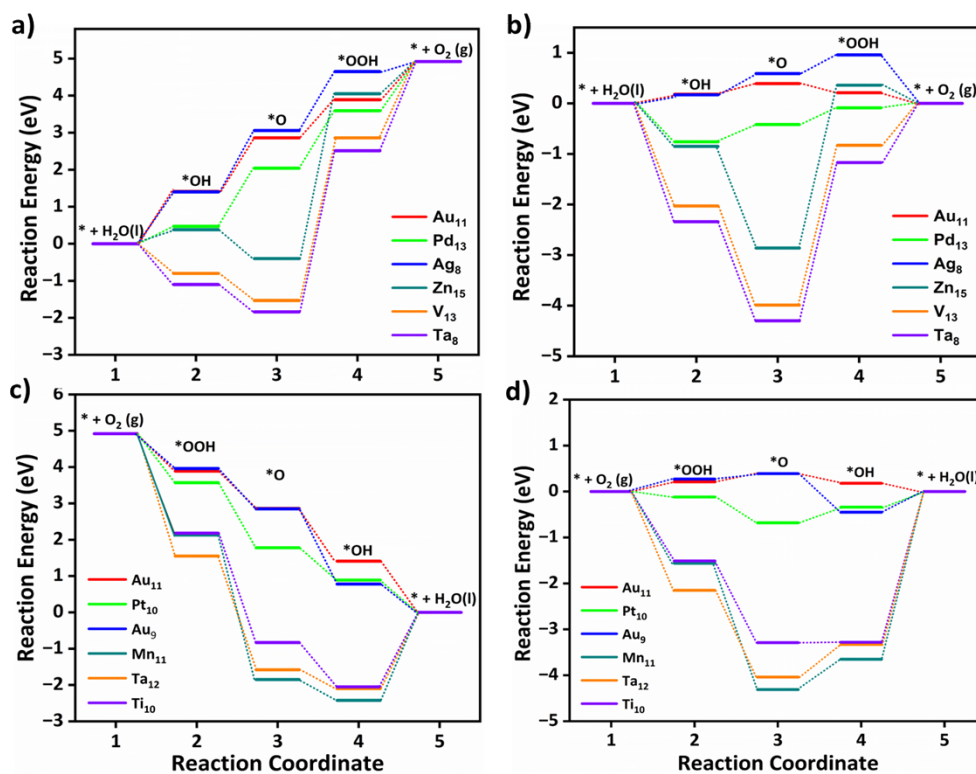

**Figure S2.** Free-energy diagrams of OER elementary steps at (a) 0 V and (b) 1.23 V, and ORR elementary steps at (c) 0 V and (d) 1.23 V.

### 4. Distribution analysis of $I_{df}$ with $E_{*O}$ , $E_{*OH}$ and $E_{*OOH}$ .

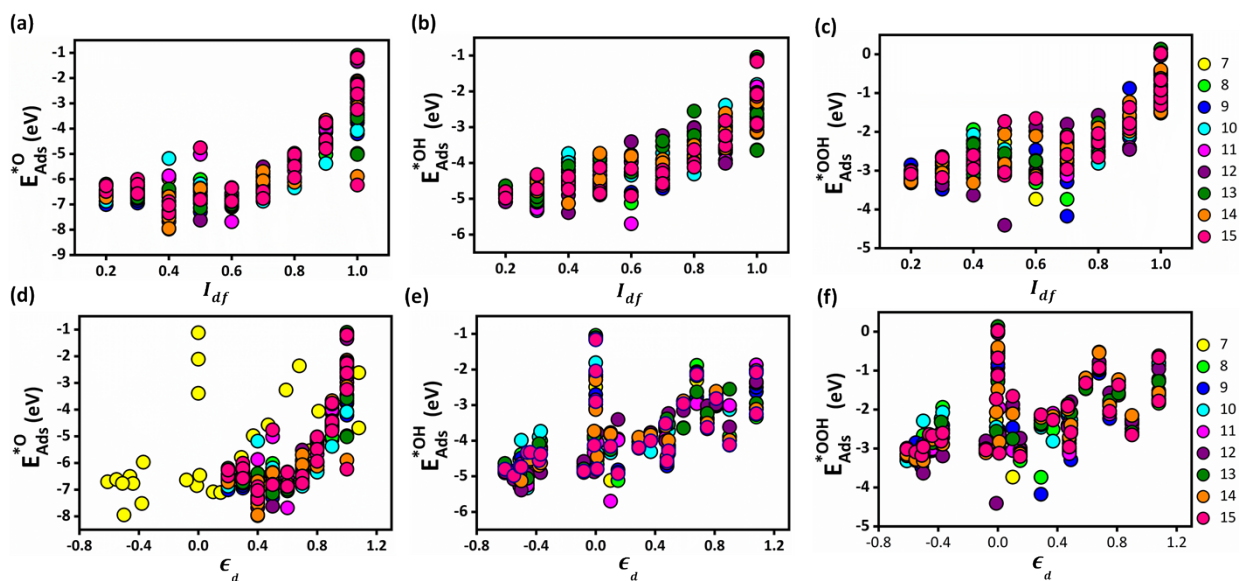

**Figure S3.** Distribution analysis between **(a-c)**  $E_{*O}$ ,  $E_{*OH}$  and  $E_{*OOH}$  and  $I_{df}$ , and **(d-f)**  $E_{*O}$ ,  $E_{*OH}$  and  $E_{*OOH}$  and  $\epsilon_d$ .

## 5. References

1. G. Kresse and J. Hafner, *Phys. Rev. B*, **1994**, 49(20), 14251
2. J. P. Perdew, J. A. Chevary, S. H. Vosko, K. A. Jackson, M. R. Pederson, D. J. Singh and C. Fiolhais, *Phys. Rev. B*, **1992**, 46(11), 6671
3. G. Kresse, D. Joubert, *Phys. Rev. B*, **1999**, 59(3), 1758.
4. M. P. Teter, M. C. Payne and D. C. Allan, *Phys. Rev. B*, **1989**, 40(18), 12255.
5. B. Zandkarimi and A. N. Alexandrova, *J. Phys. Chem. Lett.*, **2019**, 10(3), 460-467.
6. R. K. Sharma, A. S. Nair, N. Bharadwaj, D. Roy and B. Pathak, *J. Phys. Chem. C*, **2023**, 127(1), 217-228.
